# Supplementary material for: Characterization of Triadica sebifera (L.) Small Extracts, Antifeedant Activities of Extracts, Fractions, Seed Oil and Isolated Compounds against Plutella xylostella (L.) and Their Effect on Detoxification Enzymes
Source: MDPI journal article supplement (doi:10.3390/molecules27196239), 2022-09-22
Supplement: s1 [file s1]

# **Characterization of *Triadica sebifera* (L.) Small Extracts, Antifeedant Activities of Extracts, Fractions, Seed Oil and Isolated Compounds against *Plutella xylostella* (L.) and Their Effect on Detoxification Enzymes**

Shudh Kirti Dolma <sup>1,2</sup> and S. G. Eswara Reddy <sup>1,2,\*</sup>

<sup>1</sup> Entomology Laboratory, Agrotechnology Division, CSIR-Institute of Himalayan Bioresource Technology, Palampur 176061, India

<sup>2</sup> Academy of Scientific and Innovative Research (AcSIR), Ghaziabad 201002, India

\* Correspondence: ereddy@ihbt.res.in or ereddy2001@yahoo.com or sgereddy73@gmail.com

## Contents

**Figure S1.** Feeding deterrence index of leaf and bark ethanol aqueous extract and seed oil of *Triadica sebifera* against *Plutella xylostella* with choice and without choice; The same letters in the error bars (Mean $\pm$  SE) within the figure are not statistically different by Tukey's HSD ( $P \leq 0.05$ )

**Figure S2.** Feeding deterrence index of binary mixtures of seed oil with leaf and bark ethanol aqueous extract of *Triadica sebifera* against *Plutella xylostella* with choice and without choice; The same letters in the error bars (Mean $\pm$  SE) within the figure are not statistically different by Tukey's HSD ( $P \leq 0.05$ )

**Figure S3.** Feeding deterrence index of leaf fractions of *Triadica sebifera* against *Plutella xylostella* with choice and without choice; The same letters in the error bars (Mean $\pm$  SE) within the figure are not statistically different by Tukey's HSD ( $P \leq 0.05$ )

**Figure S4.** Feeding deterrence index of bark fractions of *Triadica sebifera* against *Plutella xylostella* with choice and without choice; The same letters in the error bars (Mean $\pm$  SE) within the figure are not statistically different by Tukey's HSD ( $P \leq 0.05$ )

**Tables S1.** Growth inhibition of leaf/bark extracts, fractions and seed oil of *Triadica sebifera* against *Plutella xylostella*

**Tables S2.** Growth inhibition of, leaf, bark ethanol aqueous extracts, its fractions and seed oil of *Triadica sebifera* against *Plutella xylostella* (without choice method)

**Table S3.** Growth inhibition of binary mixtures of *Triadica sebifera* against *Plutella xylostella* (without choice)

**Figure S5.** Per cent repellence of leaf and bark fractions of *Triadica sebifera* against *Plutella xylostella*; The same letters in the error bars (Mean $\pm$  SE) within the figure are not statistically different by Tukey's HSD ( $P \leq 0.05$ )

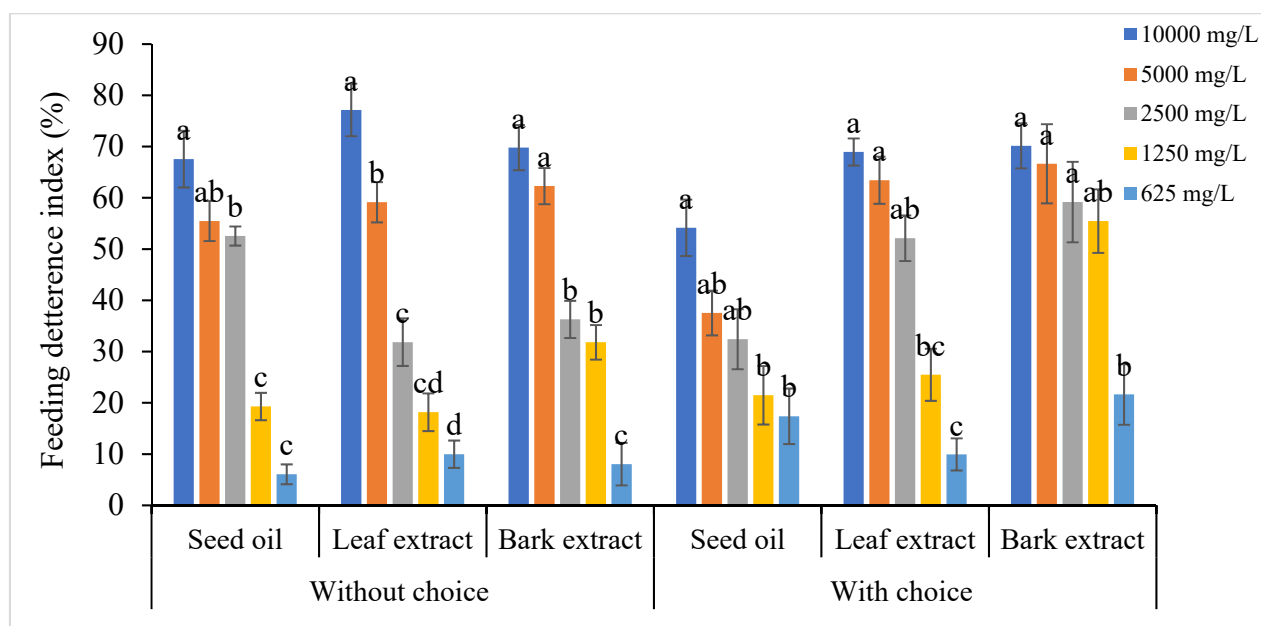

**Figure S1.** Feeding deterrence index of leaf and bark ethanol aqueous extract and seed oil of *Triadica sebifera* against *Plutella xylostella* with choice and without choice; The same letters in the error bars (Mean  $\pm$  SE) within the figure are not statistically different by Tukey's HSD ( $P \leq 0.05$ )

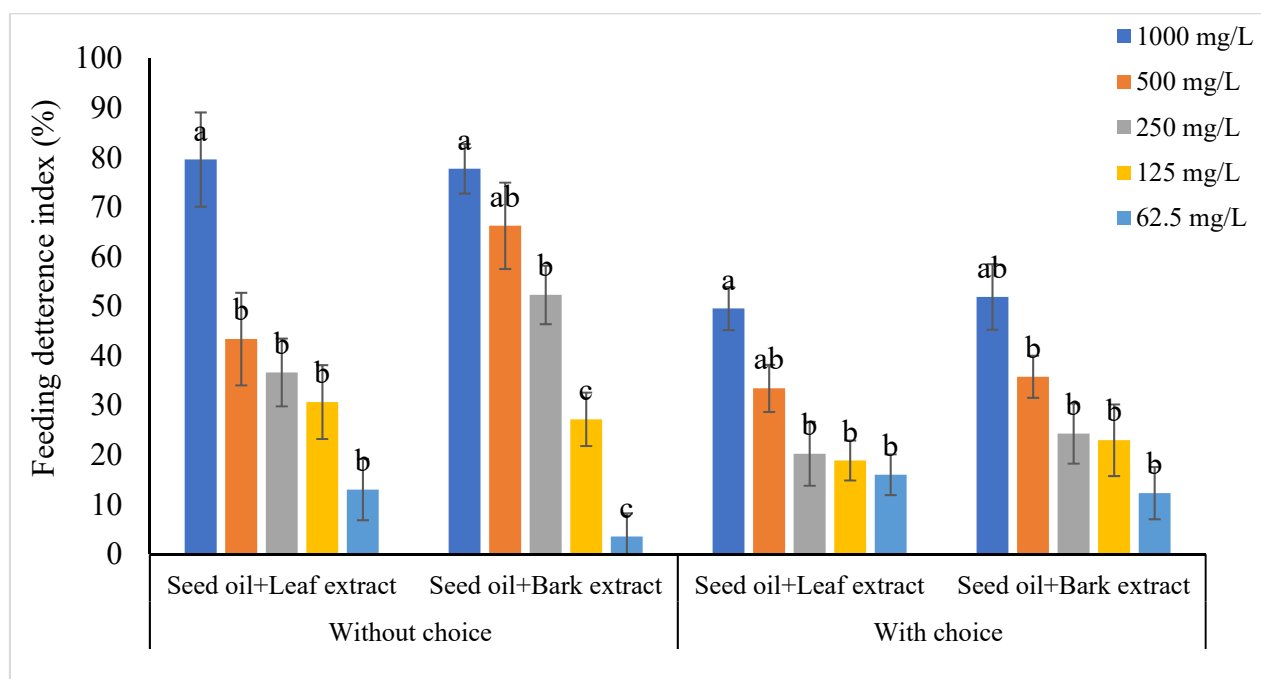

**Figure S2.** Feeding deterrence index of binary mixtures of seed oil with leaf and bark ethanol aqueous extract of *Triadica sebifera* against *Plutella xylostella* with choice and without choice; The same letters in the error bars (Mean  $\pm$  SE) within the figure are not statistically different by Tukey's HSD ( $P \leq 0.05$ )

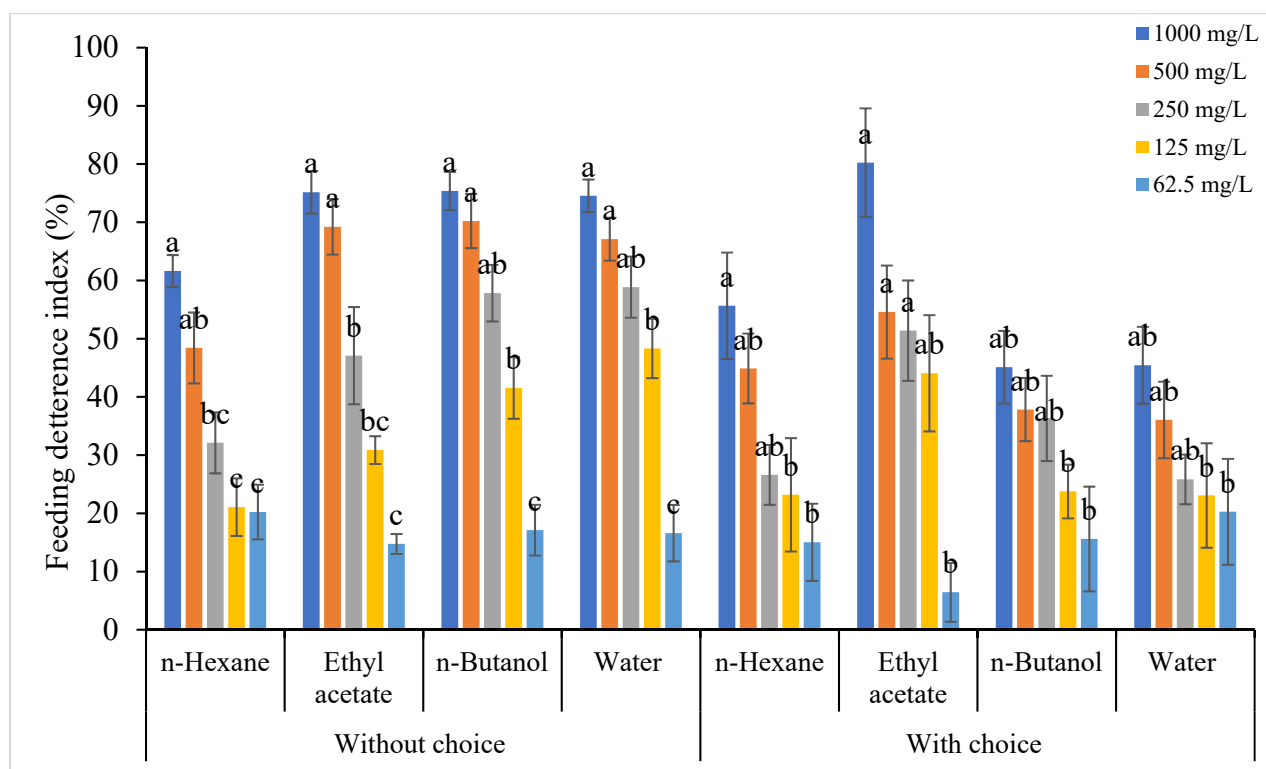

**Figure S3.** Feeding deterrence index of leaf fractions of *Triadica sebifera* against *Plutella xylostella* with choice and without choice; The same letters in the error bars (Mean  $\pm$  SE) within the figure are not statistically different by Tukey's HSD ( $P \leq 0.05$ )

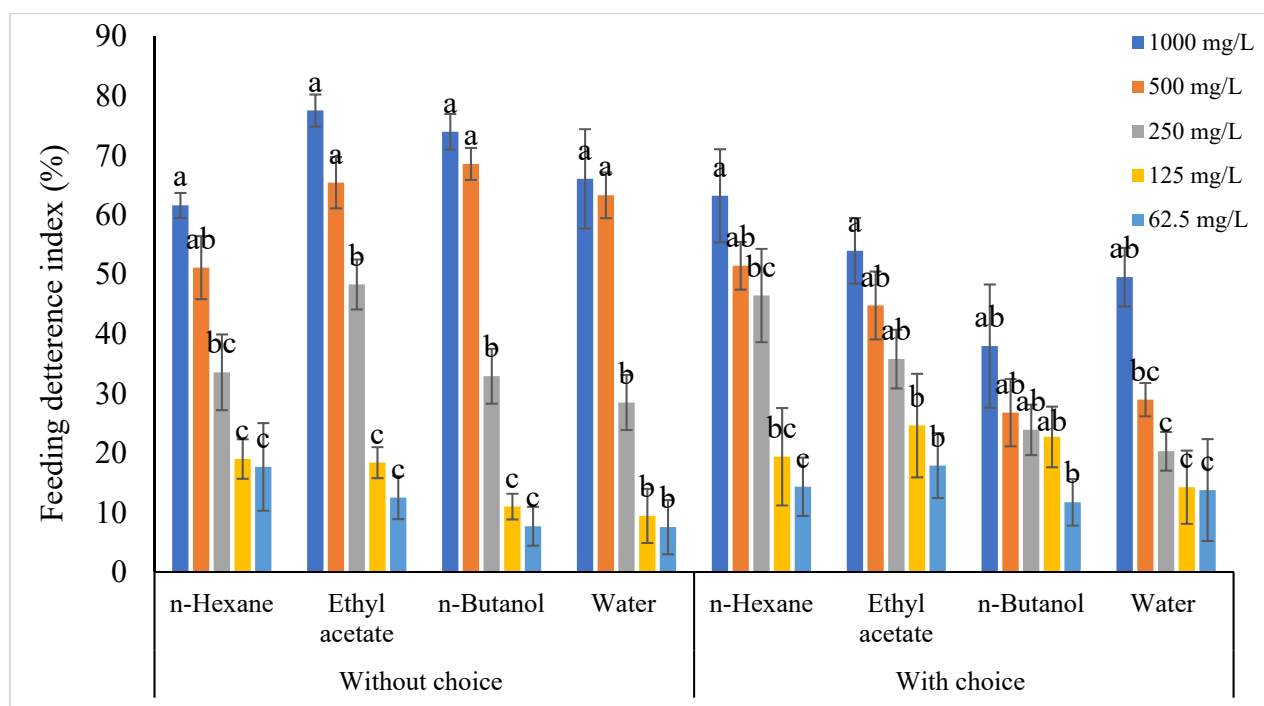

**Figure S4.** Feeding deterrence index of bark fractions of *Triadica sebifera* against *Plutella xylostella* with choice and without choice; The same letters in the error bars (Mean  $\pm$  SE) within the figure are not statistically different by Tukey's HSD ( $P \leq 0.05$ )

**Tables S1.** Growth inhibition of leaf, bark extracts, fractions and seed oil of *Triadica sebifera* against *Plutella xylostella*

| <b>Extracts/oil</b>   | <b>IC<sub>50</sub><br/>(mg/L)</b> | <b>Confidence limits<br/>(mg/L)</b> | <b>Slope ± SE</b> | <b>Chi<br/>square</b> | <b>P<br/>value</b> |
|-----------------------|-----------------------------------|-------------------------------------|-------------------|-----------------------|--------------------|
| Leaf extract          | 2696.49                           | 2308.83 – 3161.44                   | 1.82 ± 0.16       | 4.26                  | 0.23               |
| Bark extract          | –                                 | –                                   | –                 | –                     | –                  |
| Seed oil              | 3225.25                           | 2756.90 – 3811.73                   | 1.79 ± 0.16       | 0.34                  | 0.95               |
| <b>Leaf fractions</b> |                                   |                                     |                   |                       |                    |
| <i>n</i> -Butanol     | 273.55                            | 237.31 – 316.28                     | 2.03 ± 0.17       | 3.40                  | 0.26               |
| Water                 | 424.55                            | 349.74 – 533.25                     | 1.45 ± 0.15       | 3.45                  | 0.33               |
| <i>n</i> -Hexane      | –                                 | –                                   | –                 | –                     | –                  |
| Ethyl acetate         | –                                 | –                                   | –                 | –                     | –                  |
| <b>Bark fractions</b> |                                   |                                     |                   |                       |                    |
| Water                 | 315.07                            | 268.06 – 373.95                     | 1.73 ± 0.16       | 0.83                  | 0.84               |
| <i>n</i> -Hexane      | –                                 | –                                   | –                 | –                     | –                  |
| Ethyl acetate         | –                                 | –                                   | –                 | –                     | –                  |
| <i>n</i> -Butanol     | –                                 | –                                   | –                 | –                     | –                  |

–No significant difference; p<0.150

**Tables S2.** Growth inhibition of, leaf, bark ethanol aqueous extracts, its fractions and seed oil of *Triadica sebifera* against *Plutella xylostella* (without choice method)

| Conc.<br>(mg/L) | Growth inhibition rate ( $\pm$ SE) after 48 h* |                                       |                                       |                                       |
|-----------------|------------------------------------------------|---------------------------------------|---------------------------------------|---------------------------------------|
|                 | <b>Leaf/bark extracts and seed oil</b>         |                                       |                                       |                                       |
|                 | Leaf extract                                   | Bark extract                          | Seed oil                              |                                       |
| 10000           | 89.40 $\pm$ 5.83 a                             | 99.77 $\pm$ 5.02 a                    | 82.37 $\pm$ 3.25 a                    |                                       |
| 5000            | 65.86 $\pm$ 8.45 ab                            | 59.40 $\pm$ 6.20 b                    | 61.93 $\pm$ 6.10 ab                   |                                       |
| 2500            | 42.34 $\pm$ 6.99 bc                            | 35.21 $\pm$ 9.62 bc                   | 41.82 $\pm$ 7.91 bc                   |                                       |
| 1250            | 26.16 $\pm$ 7.98 c                             | 32.48 $\pm$ 5.74 bc                   | 22.27 $\pm$ 4.46 cd                   |                                       |
| 625             | 18.07 $\pm$ 2.98 c                             | 7.64 $\pm$ 9.64 c                     | 11.04 $\pm$ 2.81 d                    |                                       |
|                 | F <sub>4,49</sub> =18.93;<br>p<0.0001          | F <sub>4,49</sub> =21.66;<br>p<0.0001 | F <sub>4,49</sub> =30.37;<br>p<0.0001 |                                       |
| Conc.<br>(mg/L) | <b>Leaf fractions</b>                          |                                       |                                       |                                       |
|                 | <i>n</i> -Hexane                               | Ethyl acetate                         | <i>n</i> -Butanol                     | Water                                 |
| 1000            | 100.00 $\pm$ 0.00 a                            | 77.22 $\pm$ 4.56 a                    | 90.86 $\pm$ 4.88 a                    | 68.65 $\pm$ 5.04 a                    |
| 500             | 87.31 $\pm$ 5.47 a                             | 64.08 $\pm$ 6.20 a                    | 65.07 $\pm$ 9.73 ab                   | 56.59 $\pm$ 5.36 a                    |
| 250             | 50.60 $\pm$ 5.57 b                             | 21.44 $\pm$ 5.70 b                    | 44.46 $\pm$ 10.70 bc                  | 39.28 $\pm$ 9.37 ab                   |
| 125             | 38.40 $\pm$ 4.64 b                             | 15.91 $\pm$ 5.35 b                    | 29.01 $\pm$ 13.31 bc                  | 16.15 $\pm$ 8.79 b                    |
| 62.5            | 34.50 $\pm$ 6.30 b                             | 10.80 $\pm$ 4.86 b                    | 9.27 $\pm$ 9.18 c                     | 14.07 $\pm$ 9.35 b                    |
|                 | F <sub>4,49</sub> =36.07;<br>p<0.0001          | F <sub>4,49</sub> =32.31;<br>p<0.0001 | F <sub>4,49</sub> =10.11;<br>p<0.0001 | F <sub>4,49</sub> =9.51;<br>p<0.0001  |
| Conc.<br>(mg/L) | <b>Bark fractions</b>                          |                                       |                                       |                                       |
|                 | <i>n</i> -Hexane                               | Ethyl acetate                         | <i>n</i> -Butanol                     | Water                                 |
| 1000            | 96.24 $\pm$ 2.10 a                             | 99.68 $\pm$ 3.03 a                    | 87.36 $\pm$ 7.17 a                    | 79.92 $\pm$ 2.95 a                    |
| 500             | 86.36 $\pm$ 5.29 a                             | 52.30 $\pm$ 8.55 b                    | 54.53 $\pm$ 9.57 ab                   | 66.21 $\pm$ 5.31 a                    |
| 250             | 54.36 $\pm$ 6.36 b                             | 46.47 $\pm$ 6.06 bc                   | 27.38 $\pm$ 10.76 bc                  | 39.89 $\pm$ 7.14 b                    |
| 125             | 34.58 $\pm$ 3.32 bc                            | 33.51 $\pm$ 8.66 bc                   | 21.25 $\pm$ 5.89 bc                   | 26.32 $\pm$ 7.96 bc                   |
| 62.5            | 28.57 $\pm$ 7.36 c                             | 20.97 $\pm$ 3.61 c                    | 10.05 $\pm$ 10.14 c                   | 10.75 $\pm$ 4.79 c                    |
|                 | F <sub>4,49</sub> =33.26;<br>p<0.0001          | F <sub>4,49</sub> =21.73;<br>p<0.0001 | F <sub>4,49</sub> =12.18;<br>p<0.0001 | F <sub>4,49</sub> =23.06;<br>p<0.0001 |

\*Mean of three replications; Mean followed by the same letter within a column are not statistically different by Tukey's HSD ( $P \geq 0.05$ )



**Table S3.** Growth inhibition of binary mixtures of *Triadica sebifera* against *Plutella xylostella* (without choice)

| Conc.<br>(mg/L)   | Growth inhibition rate ( $\pm$ SE) after 48 h* |                         |
|-------------------|------------------------------------------------|-------------------------|
|                   | Seed oil + Leaf extract                        | Seed oil + Bark extract |
| 1000              | 99.87 $\pm$ 4.48 a                             | 98.77 $\pm$ 7.92 a      |
| 500               | 88.06 $\pm$ 5.52 ab                            | 85.76 $\pm$ 7.63 ab     |
| 250               | 80.44 $\pm$ 8.13 abc                           | 84.23 $\pm$ 6.81 ab     |
| 125               | 63.19 $\pm$ 4.68 bc                            | 72.56 $\pm$ 4.62 ab     |
| 62.5              | 55.15 $\pm$ 10.66 c                            | 54.28 $\pm$ 11.40 b     |
| F <sub>4,49</sub> | 6.56; $p < 0.0001$                             | 4.34; $p < 0.005$       |

\*Mean of three replications; Mean followed by the same letter with in a column are not statistically different by Tukey's HSD ( $p \geq 0.05$ )

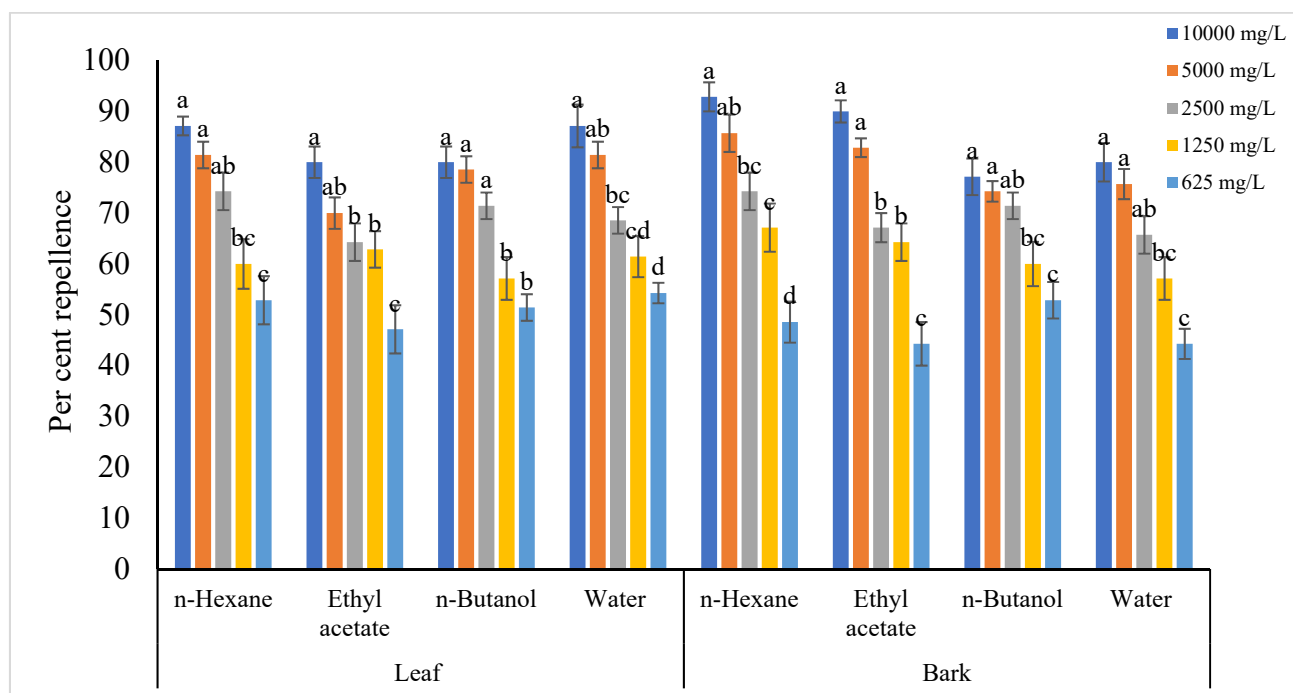

**Figure S5.** Per cent repellence of leaf and bark fractions of *Triadica sebifera* against *Plutella xylostella*; The same letters in the error bars (Mean  $\pm$  SE) within the figure are not statistically different by Tukey's HSD ( $P \leq 0.05$ )
